# Supplementary material for: Nanoporous cobalt foam and a Co/Co(OH)2 core–shell structure for electrochemical applications
Source: Royal Society of Chemistry journal article supplement (doi:10.1039/c3ta11062a), 2013-01-01
Supplement: c3ta11062a.pdf [file c3ta11062a.pdf]

**Electronic Supporting Information for**

**Nanoporous cobalt foam and Co/Co(OH)<sub>2</sub> core-shell structure for electrochemical applications**

Yun K. Kim<sup>a</sup>, Seung I. Cha<sup>b</sup>, and Soon H. Hong<sup>a</sup>

<sup>a</sup>Department of Materials Science and Engineering, Korea Advanced Institute of Science and Technology, 335 Gwahangno, Yuseong-gu, Daejeon 305-701, Korea

<sup>b</sup>Optoelectric Research Group, Advanced Materials & Application Research Division, Korea Electrotechnology Research Institute (KERI), 70 Boolmosangil, Changwon 641-120, Korea

E-mail: shhong@kaist.ac.kr, sicha@keri.re.kr

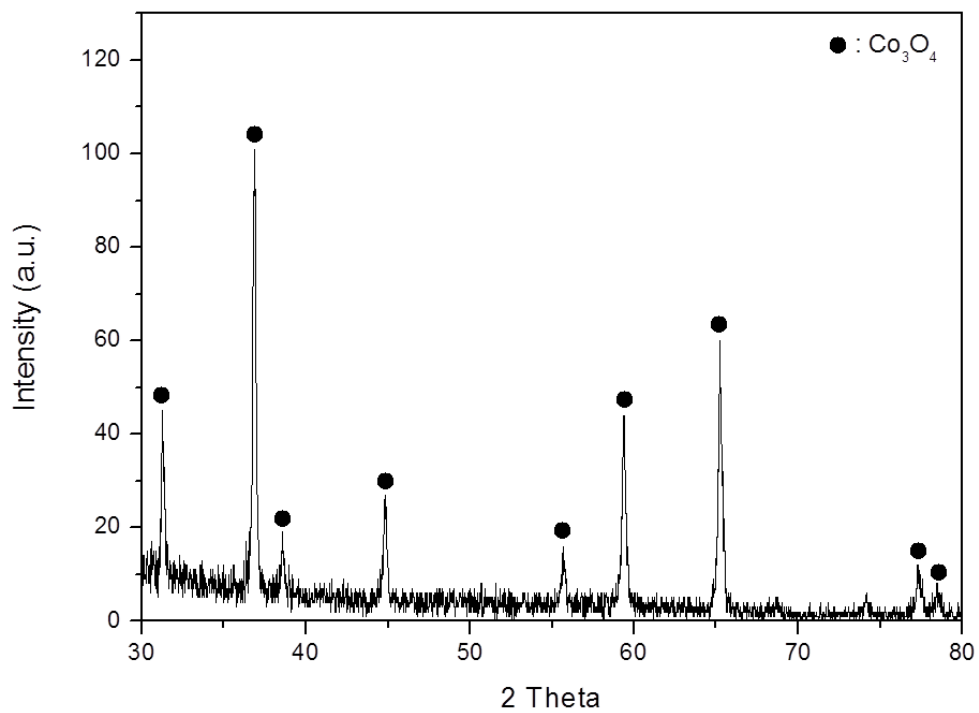

**Figure S1.** X-Ray diffraction patterns of the CNT/Co<sub>3</sub>O<sub>4</sub> nanocomposite powder. The all detected peaks were indicated Co<sub>3</sub>O<sub>4</sub> (JCPDS Card No. 43-1003).

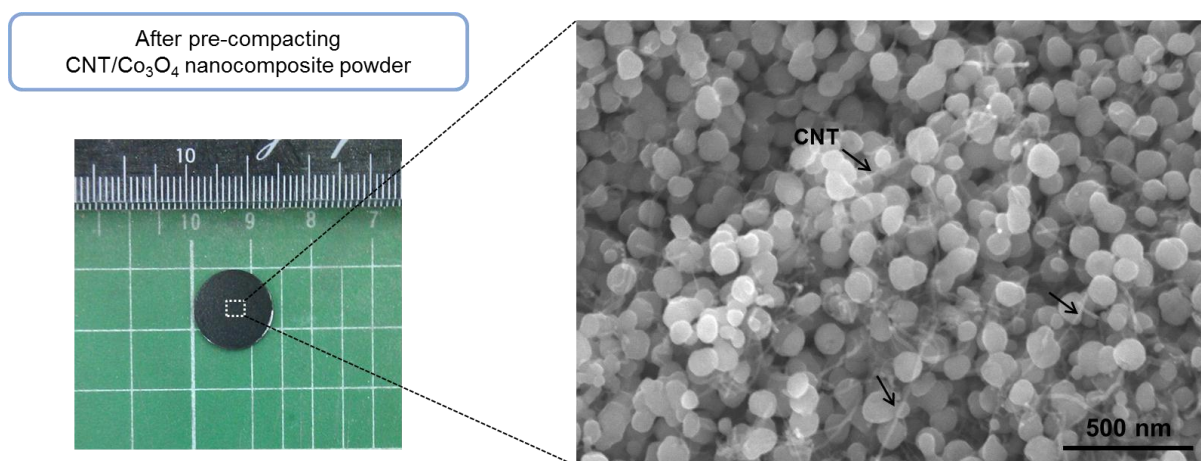

**Figure S2.** The picture and SEM image of the pre-compacted CNT/Co<sub>3</sub>O<sub>4</sub> nanocomposite powder.

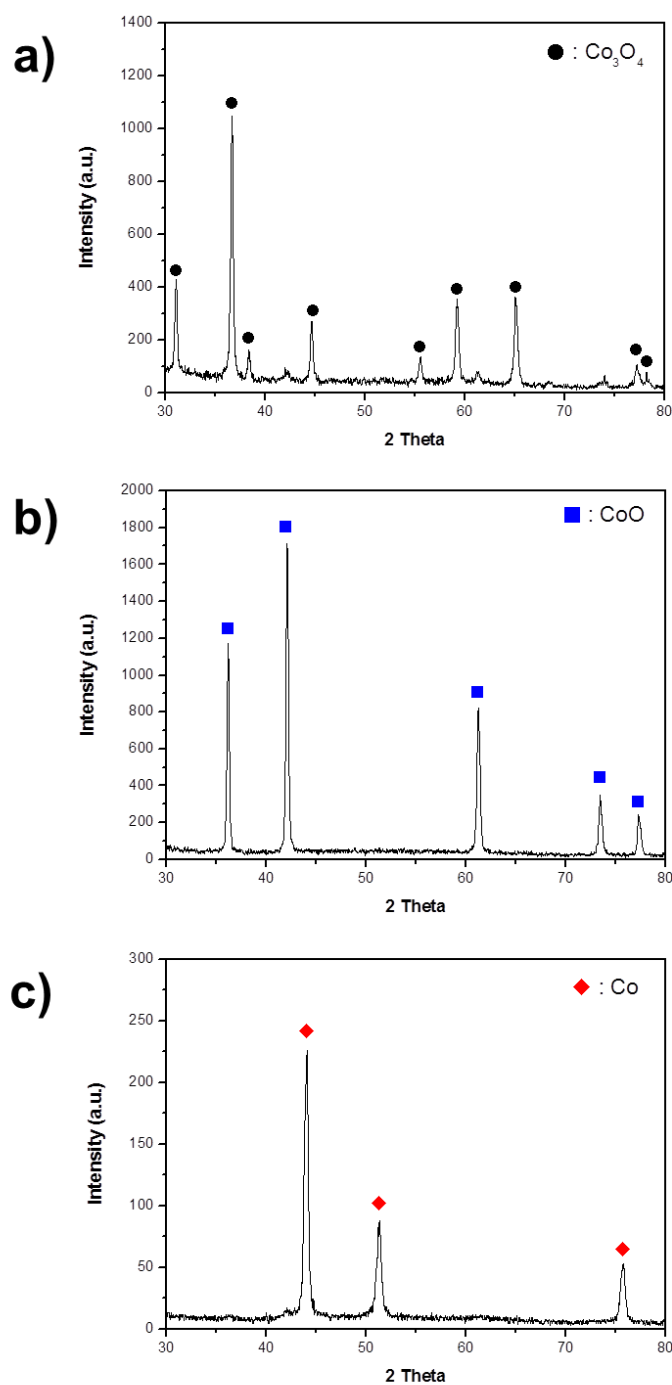

**Figure S3.** a) XRD patterns of the consolidated  $\text{Co}_3\text{O}_4$  nanoparticles at 750 °C, 10 h, b) XRD patterns of the consolidated CNT/ $\text{Co}_3\text{O}_4$  nanocomposite powder at 650 °C, 5 h and c) XRD patterns of the consolidated CNT/ $\text{Co}_3\text{O}_4$  nanocomposite powder at 650 °C, 10 h.

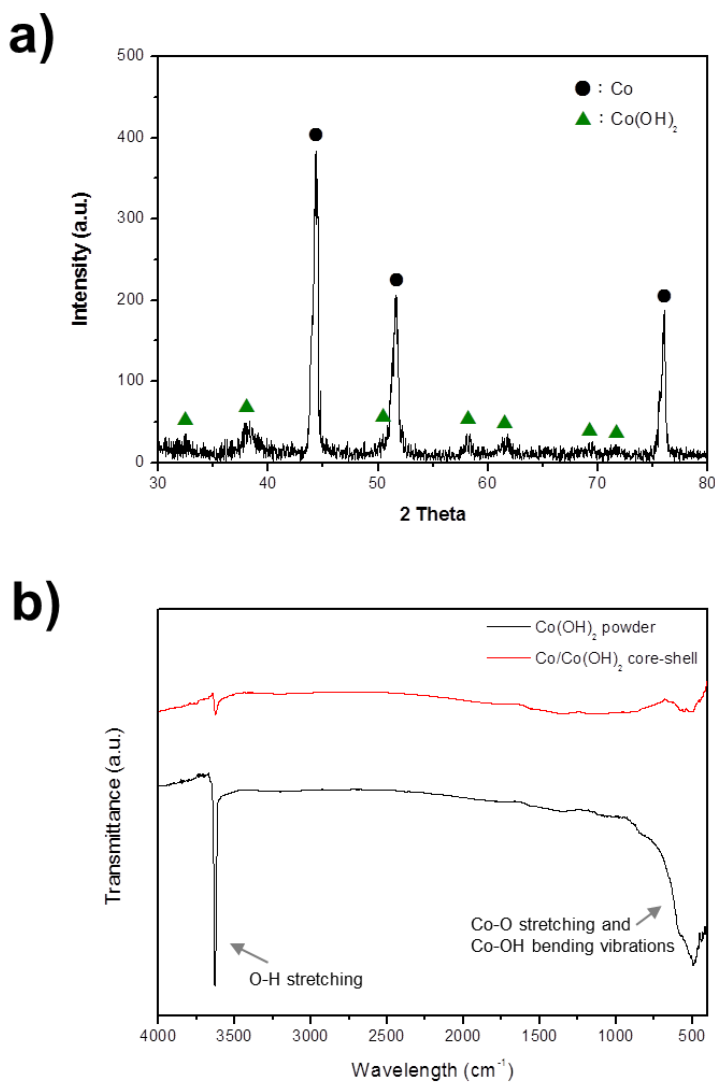

**Figure S4.** a) The X-ray diffraction analysis of the Co/Co(OH)<sub>2</sub> core-shell structure. The Major cobalt peaks appeared from nanoporous cobalt foam and the minor patterns exhibit the typical diffraction peaks of the  $\beta$ -Co(OH)<sub>2</sub> (JCPDS Card No. 30-0443), b) The FT-IR analysis of Co/Co(OH)<sub>2</sub> core-shell structure shown peaks from O-H stretching (3630 cm<sup>-1</sup>) and Co-O stretching and Co-OH bending vibrations in the brucite-like octahedral sheet (400-600 cm<sup>-1</sup>), which indicating  $\beta$ -Co(OH)<sub>2</sub> phase.<sup>29</sup>

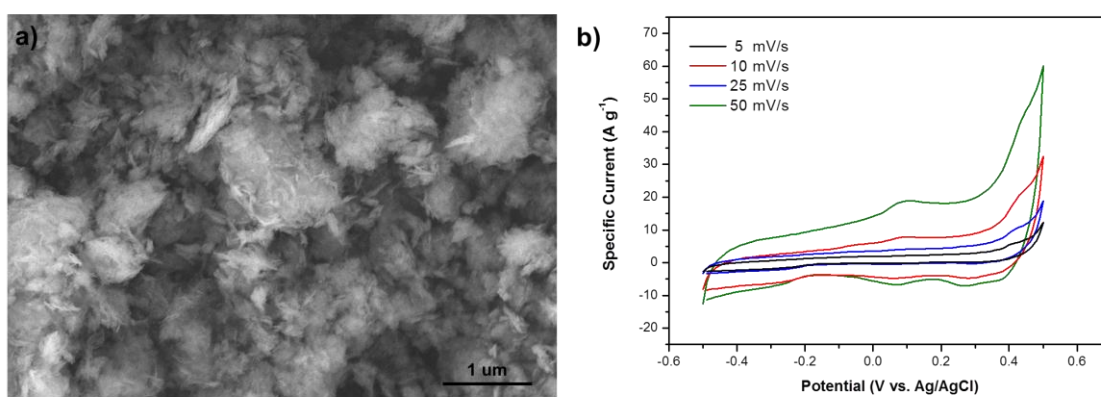

**Figure S5.** a) SEM image of the  $\text{Co(OH)}_2$  flakes which synthesized for a control experiment, b) The cyclic voltammograms of the  $\text{Co(OH)}_2$  electrode with various scan rate. The specific capacitances calculated from the CV curves are 468.5, 435.1, 420.2, and 408.1  $\text{F g}^{-1}$  for scan rates of 5, 10, 25, and 50  $\text{mV s}^{-1}$ , respectively.

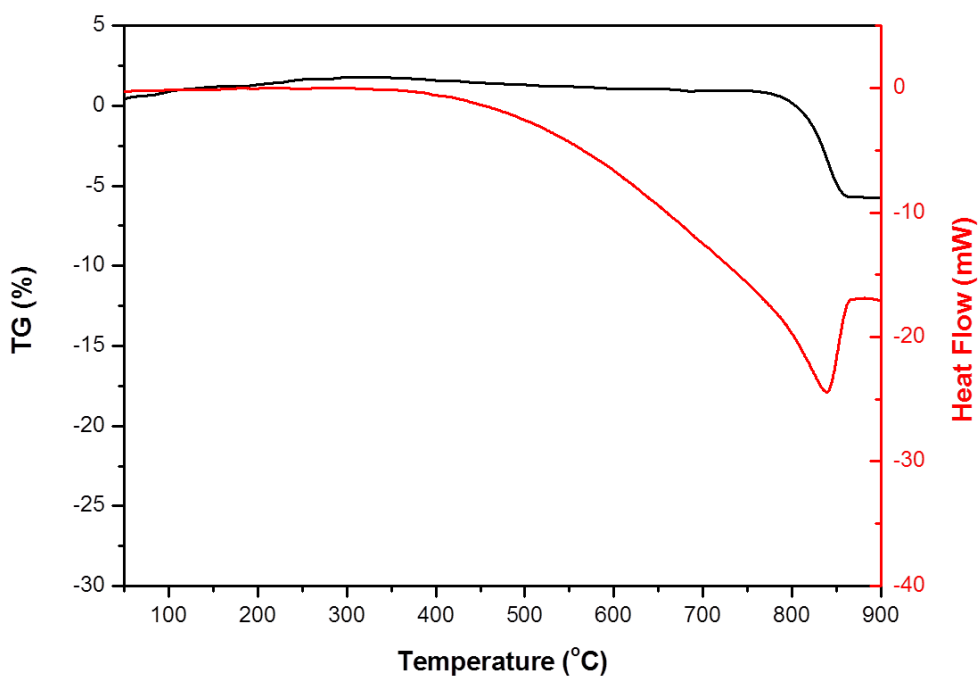

**Figure S6.** TG-DSC curves for  $\text{Co}_3\text{O}_4$  powders. The  $\text{Co}_3\text{O}_4$  powder without CNTs, did not show any change until 800 °C, at the same TG-DSC analysis conditions with the CNT/ $\text{Co}_3\text{O}_4$  nanocomposite ( $\text{N}_2$ , 5 °C/min). Over 800 °C, some weight loss with endothermic reaction is observed, which is corresponding to the thermal decomposition reaction of  $\text{Co}_3\text{O}_4$  to  $\text{CoO}$ .
